# Supplementary material for: MAS C-Terminal Tail Interacting Proteins Identified by Mass Spectrometry- Based Proteomic Approach
Source: PLoS One. 2015 Oct 20;10(10):e0140872. doi: 10.1371/journal.pone.0140872 (PMC4618059; doi:10.1371/journal.pone.0140872)
Supplement: S3 Table — List of all the proteins identified by MS in the elution fractions of resin alone and Ct bound resin from the pull down assay with cardiac tissue lysates. Data is provided as an excel file along with the spectral counts, normalized spectral ratios, protein accession numbers and additional annotations. (XLSX) [file pone.0140872.s004.xlsx]

## Sheet: Karnik_2241_Table2_Significance
				Pooled		Spectral counts	Normalized
	Protein	accession	Mass	Spectral Counts		> 10	SC ratio
S.No			Da	-	+	Significant	+/-	acc	uniprot	short_name	PDZ domain
1	78 glucose-regulated protein precursor	gi|16507237	72	0	78	yes	inf	NP_005338	P11021	GRP78	FALSE
2	acetyl-CoA carboxylase 2 precursor	gi|134142062	277	0	56	yes	inf	NP_001084	O00763	ACACB	FALSE
3	disks large homolog 1 isoform 2	gi|148539578	103	0	37	yes	inf	NP_004078	Q12959	DLG1	TRUE
4	NAD(P) transhydrogenase, mitochondrial	gi|122939155	114	0	23	yes	inf	NP_036475	Q13423	NNTM	FALSE
5	alpha-1-syntrophin	gi|4507137	54	0	18	yes	inf	NP_003089	Q13424	SNTA1	TRUE
6	elongation factor 1-alpha 1	gi|4503471	50	0	18	yes	inf	NP_001393	P68104	EF1A1	FALSE
7	heat shock protein HSP 90-alpha isoform 1	gi|153792590	98	0	17	yes	inf	NP_001017963	P07900	HS90A	FALSE
8	hemoglobin subunit alpha	gi|4504345	15	0	15	yes	inf	NP_000508	P69905	HBA	FALSE
9	eukaryotic initiation factor 4A-II	gi|83700235	46	0	14	yes	inf	NP_001958	Q14240	IF4A2	FALSE
10	peroxiredoxin-1	gi|320461711	22	0	14	yes	inf	NP_001189360	Q06830	PRDX1	FALSE
11	hemicentin-1 precursor	gi|118572606	613	0	13	yes	inf	NP_114141	Q96RW7	HMCN1	FALSE
12	membrane-associated guanylate kinase, WW and PDZ domain-containing protein 1 isoform c	gi|74272284	162	0	13	yes	inf	NP_001028229	Q96QZ7	MAGI1	TRUE
13	troponin I, cardiac muscle	gi|151101270	24	0	13	yes	inf	NP_000354	P19429	TNNI3	FALSE
14	cathepsin D preproprotein	gi|4503143	45	0	12	yes	inf	NP_001900	P07339	CATD	FALSE
15	ADP-ribosylation factor 1	gi|4502201	21	0	11	yes	inf	NP_001649	P84077	ARF1	FALSE
16	acyl-coenzyme A thioesterase 9, mitochondrial isoform b precursor	gi|81295404	50	0	11	yes	inf	NP_001028755	Q9Y305	ACOT9	FALSE
17	NADH-cytochrome b5 reductase 1	gi|49574502	34	0	10	no	inf	NP_057327	Q9UHQ9	NB5R1	FALSE
18	calcium/calmodulin-dependent protein kinase type II subunit delta isoform 5	gi|212549753	56	0	10	no	inf	NP_742112	Q13557	KCC2D	FALSE
19	succinate dehydrogenase [ubiquinone] iron-sulfur subunit, mitochondrial precursor	gi|115387094	32	0	10	no	inf	NP_002991	P21912	DHSB	FALSE
20	cysteine-rich protein 2	gi|4503049	22	0	9	no	inf	NP_001303	P52943	CRIP2	FALSE
21	dihydropyrimidinase-related protein 2 isoform 1	gi|308818195	74	0	9	no	inf	NP_001184222	Q16555	DPYL2	FALSE
22	fumarate hydratase, mitochondrial	gi|19743875	55	0	9	no	inf	NP_000134	P07954	FUMH	FALSE
23	carnitine O-palmitoyltransferase 2, mitochondrial precursor	gi|4503023	74	0	8	no	inf	NP_000089	P23786	CPT2	FALSE
24	enoyl-CoA delta isomerase 2, mitochondrial isoform 2	gi|260274832	44	0	8	no	inf	NP_996667	O75521	ECI2	FALSE
25	integrin-linked protein kinase	gi|4758606	51	0	8	no	inf	NP_004508	Q13418	ILK	FALSE
26	neuroblast differentiation-associated protein AHNAK isoform 1	gi|61743954	629	0	8	no	inf	NP_001611	Q09666	AHNK	FALSE
27	troponin C, slow skeletal and cardiac muscles	gi|4507615	18	0	8	no	inf	NP_003271	P63316	TNNC1	FALSE
28	troponin T, cardiac muscle isoform 1	gi|48255877	36	0	8	no	inf	NP_000355	P45379	TNNT2	FALSE
29	ADP-ribosylation factor 4	gi|4502205	21	0	7	no	inf	NP_001651	P18085	ARF4	FALSE
30	NADH dehydrogenase [ubiquinone] 1 alpha subcomplex subunit 10, mitochondrial precursor	gi|4758768	41	0	7	no	inf	NP_004535	O95299	NDUAA	FALSE
31	NADH-cytochrome b5 reductase 3 isoform 2	gi|193794826	32	0	7	no	inf	NP_001123291	P00387	NB5R3	FALSE
32	elongation factor 2	gi|4503483	95	0	7	no	inf	NP_001952	P13639	EF2	FALSE
33	malate dehydrogenase, cytoplasmic isoform 1	gi|312283701	39	0	7	no	inf	NP_001186040	P40925	MDHC	FALSE
34	prostaglandin E synthase 2	gi|13376617	42	0	7	no	inf	NP_079348	Q9H7Z7	PGES2	FALSE
35	sorting nexin-27	gi|31742501	60	0	7	no	inf	NP_112180	Q96L92	SNX27	TRUE
36	ubiquinone biosynthesis monooxygenase COQ6 isoform a	gi|32967305	51	0	7	no	inf	NP_872282	Q9Y2Z9	COQ6	FALSE
37	ATP synthase subunit g, mitochondrial	gi|51479156	11	0	6	no	inf	NP_006467	O75964	ATP5L	FALSE
38	ATP5J2-PTCD1 fusion protein	gi|311893396	84	0	6	no	inf	NP_001185808	G3V325	G3V325	FALSE
39	GTP-binding nuclear protein Ran	gi|5453555	24	0	6	no	inf	NP_006316	P62826	RAN	FALSE
40	NADH dehydrogenase [ubiquinone] 1 alpha subcomplex subunit 4	gi|4505357	9	0	6	no	inf	NP_002480	O00483	NDUA4	FALSE
41	adenylate kinase isoenzyme 1	gi|4502011	22	0	6	no	inf	NP_000467	P00568	KAD1	FALSE
42	amine oxidase [flavin-containing] A	gi|4557735	60	0	6	no	inf	NP_000231	P21397	AOFA	FALSE
43	amine oxidase [flavin-containing] B	gi|38202207	59	0	6	no	inf	NP_000889	P27338	AOFB	FALSE
44	annexin A2 isoform 2	gi|209862831	39	0	6	no	inf	NP_001129487	P07355	ANXA2	FALSE
45	fatty acid-binding protein, heart	gi|4758328	15	0	6	no	inf	NP_004093	P05413	FABPH	FALSE
46	glutaryl-CoA dehydrogenase, mitochondrial isoform a precursor	gi|4503943	48	0	6	no	inf	NP_000150	Q92947	GCDH	FALSE
47	isoleucyl-tRNA synthetase, mitochondrial precursor	gi|46852147	114	0	6	no	inf	NP_060530	Q9NSE4	SYIM	FALSE
48	malate dehydrogenase, mitochondrial precursor	gi|21735621	36	0	6	no	inf	NP_005909	P40926	MDHM	FALSE
49	poly(rC)-binding protein 1	gi|222352151	37	0	6	no	inf	NP_006187	Q15365	PCBP1	FALSE
50	protein NipSnap homolog 2 isoform 1	gi|4503937	34	0	6	no	inf	NP_001474	O75323	NIPS2	FALSE
51	GTP:AMP phosphotransferase, mitochondrial isoform a	gi|19923437	26	0	5	no	inf	NP_057366	Q9UIJ7	KAD3	FALSE
52	GTPase KRas isoform b precursor	gi|15718761	21	0	5	no	inf	NP_004976	P01116	RASK	FALSE
53	NAD-dependent deacetylase sirtuin-3, mitochondrial isoform a	gi|6912660	44	0	5	no	inf	NP_036371	Q9NTG7	SIR3	FALSE
54	coagulation factor XIII A chain precursor	gi|119395709	83	0	5	no	inf	NP_000120	P00488	F13A	FALSE
55	isobutyryl-CoA dehydrogenase, mitochondrial	gi|7656849	45	0	5	no	inf	NP_055199	Q9UKU7	ACAD8	FALSE
56	pyruvate dehydrogenase kinase, isozyme 1	gi|4505689	49	0	5	no	inf	NP_002601	Q15118	PDK1	FALSE
57	ras-related protein Rab-14	gi|19923483	24	0	5	no	inf	NP_057406	P61106	RAB14	FALSE
58	ras-related protein Rab-7a	gi|34147513	23	0	5	no	inf	NP_004628	P51149	RAB7A	FALSE
59	EH domain-containing protein 2	gi|21361462	61	0	4	no	inf	NP_055416	Q9NZN4	EHD2	FALSE
60	aspartate aminotransferase, mitochondrial precursor	gi|73486658	48	0	4	no	inf	NP_002071	P00505	AATM	FALSE
61	carnitine O-palmitoyltransferase 1, muscle isoform isoform a	gi|223468672	88	0	4	no	inf	NP_001138607	Q92523	CPT1B	FALSE
62	dystrobrevin alpha isoform 8	gi|14916515	22	0	4	no	inf	NP_116763	Q9Y4J8	DTNA	FALSE
63	glycogen [starch] synthase, muscle isoform 2	gi|239049591	76	0	4	no	inf	NP_001155059	P13807	GYS1	FALSE
64	polymerase I and transcript release factor	gi|42734430	43	0	4	no	inf	NP_036364	Q6NZI2	PTRF	FALSE
65	serine/threonine-protein phosphatase 2A 65 regulatory subunit A alpha isoform	gi|21361399	65	0	4	no	inf	NP_055040	P30153	2AAA	FALSE
66	sodium/potassium-transporting ATPase subunit beta-1	gi|4502277	35	0	4	no	inf	NP_001668	P05026	AT1B1	FALSE
67	syntenin-1 isoform 3	gi|55749515	32	0	4	no	inf	NP_001007070	O00560	SDCB1	TRUE
68	2-oxoisovalerate dehydrogenase subunit alpha, mitochondrial isoform 2 precursor	gi|258645172	50	0	3	no	inf	NP_001158255	B4DP47	B4DP47	FALSE
69	cadherin-2 preproprotein	gi|14589889	100	0	3	no	inf	NP_001783	P19022	CADH2	FALSE
70	glutathione S-transferase kappa 1 isoform d	gi|219842335	21	0	3	no	inf	NP_001137153	Q9Y2Q3	GSTK1	FALSE
71	histone acetyltransferase KAT6B	gi|100816397	231	0	3	no	inf	NP_036462	Q8WYB5	KAT6B	FALSE
72	mitochondrial fission 1 protein	gi|151108473	17	0	3	no	inf	NP_057152	Q9Y3D6	FIS1	FALSE
73	peroxisomal multifunctional enzyme type 2 isoform 2	gi|4504505	80	0	3	no	inf	NP_000405	P51659	DHB4	FALSE
74	protein DJ-1	gi|183227678	20	0	3	no	inf	NP_001116849	Q99497	PARK7	FALSE
75	retinol dehydrogenase 13 isoform 1 precursor	gi|225579078	36	0	3	no	inf	NP_001139443	Q8NBN7	RDH13	FALSE
76	biglycan preproprotein	gi|4502403	42	0	2	no	inf	NP_001702	P21810	PGS1	FALSE
77	multiple PDZ domain protein	gi|148746189	219	0	2	no	inf	NP_003820	O75970	MPDZ	TRUE
78	myosin-7	gi|115496169	223	0	2	no	inf	NP_000248	P12883	MYH7	FALSE
79	ribosomal protein S6 kinase beta-1	gi|4506737	59	0	2	no	inf	NP_003152	P23443	KS6B1	FALSE
80	trimethylguanosine synthase	gi|151301096	97	0	2	no	inf	NP_079107	Q96RS0	TGS1	FALSE
81	ubiquitin-60S ribosomal protein L40 precursor	gi|77539055	15	0	2	no	inf	NP_001029102	P62987	RL40	FALSE
82	vinculin isoform VCL	gi|4507877	117	0	2	no	inf	NP_003364	P18206	VINC	FALSE
83	EH domain-containing protein 4	gi|21264315	61	3	22	yes	4.18	NP_644670	Q9H223	EHD4	FALSE
84	methylcrotonoyl-CoA carboxylase subunit alpha, mitochondrial precursor	gi|116805327	80	11	72	yes	3.73	NP_064551	Q96RQ3	MCCA	FALSE
85	heat shock cognate 71 protein isoform 1	gi|5729877	71	17	105	yes	3.52	NP_006588	P11142	HSP7C	FALSE
86	stress-70 protein, mitochondrial precursor	gi|24234688	74	13	79	yes	3.46	NP_004125	P38646	GRP75	FALSE
87	NADH-ubiquinone oxidoreductase 75 subunit, mitochondrial isoform 4	gi|316983156	74	3	16	yes	3.04	NP_001186912	P28331	NDUS1	FALSE
88	peroxiredoxin-6	gi|4758638	25	4	20	yes	2.85	NP_004896	P30041	PRDX6	FALSE
89	cytochrome b-c1 complex subunit 1, mitochondrial precursor	gi|46593007	53	2	10	no	2.85	NP_003356	P31930	QCR1	FALSE
90	dual specificity protein phosphatase 3	gi|4758208	20	2	10	no	2.85	NP_004081	P51452	DUS3	FALSE
91	D-beta-hydroxybutyrate dehydrogenase, mitochondrial precursor	gi|44680133	38	6	26	yes	2.47	NP_976060	Q02338	BDH	FALSE
92	perilipin-4	gi|122937195	134	11	45	yes	2.33	NP_001073869	Q96Q06	PLIN4	FALSE
93	thiomorpholine-carboxylate dehydrogenase isoform 1	gi|4503065	34	12	46	yes	2.18	NP_001879	Q14894	CRYM	FALSE
94	2-oxoglutarate dehydrogenase, mitochondrial isoform 3 precursor	gi|259013553	116	6	23	yes	2.18	NP_001158508	Q02218	ODO1	FALSE
95	cytochrome b-c1 complex subunit 2, mitochondrial precursor	gi|50592988	48	5	18	yes	2.05	NP_003357	P22695	QCR2	FALSE
96	myoglobin	gi|4885477	17	6	21	yes	1.99	NP_005359	P02144	MYG	FALSE
97	lipoamide acyltransferase component of branched-chain alpha-keto acid dehydrogenase complex, mitochondrial precursor	gi|110671329	54	2	7	no	1.99	NP_001909	P11182	ODB2	FALSE
98	succinate dehydrogenase [ubiquinone] flavoprotein subunit, mitochondrial	gi|156416003	73	5	17	yes	1.94	NP_004159	P31040	DHSA	FALSE
99	3-hydroxyacyl-CoA dehydrogenase type-2 isoform 1	gi|4758504	27	9	30	yes	1.9	NP_004484	Q99714	HCD2	FALSE
100	trifunctional enzyme subunit beta, mitochondrial precursor	gi|4504327	51	20	64	yes	1.82	NP_000174	P55084	ECHB	FALSE
101	glycerol-3-phosphate dehydrogenase 1-like protein	gi|24307999	38	5	16	yes	1.82	NP_055956	Q8N335	GPD1L	FALSE
102	glyceraldehyde-3-phosphate dehydrogenase	gi|7669492	36	52	163	yes	1.79	NP_002037	P04406	G3P	FALSE
103	ADP/ATP translocase 1	gi|55749577	33	28	86	yes	1.75	NP_001142	P12235	ADT1	FALSE
104	electron transfer flavoprotein-ubiquinone oxidoreductase, mitochondrial precursor	gi|119703746	68	10	29	yes	1.65	NP_004444	Q16134	ETFD	FALSE
105	very long-chain specific acyl-CoA dehydrogenase, mitochondrial isoform 1 precursor	gi|4557235	70	64	175	yes	1.56	NP_000009	P49748	ACADV	FALSE
106	alpha-1-antitrypsin precursor	gi|50363217	47	9	24	yes	1.52	NP_000286	P01009	A1AT	FALSE
107	hydroxysteroid dehydrogenase-like protein 2 isoform 1	gi|40254986	45	6	16	yes	1.52	NP_115679	Q6YN16	HSDL2	FALSE
108	four and a half LIM domains protein 1 isoform 5	gi|228480205	34	5	13	yes	1.48	NP_001153171	Q13642	FHL1	FALSE
109	heat shock protein beta-1	gi|4504517	23	46	119	yes	1.47	NP_001531	P04792	HSPB1	FALSE
110	long-chain-fatty-acid--CoA ligase 1	gi|40807491	78	20	51	yes	1.45	NP_001986	P33121	ACSL1	FALSE
111	succinyl-CoA:3-ketoacid-coenzyme A transferase 1, mitochondrial precursor	gi|4557817	56	11	28	yes	1.45	NP_000427	P55809	SCOT1	FALSE
112	tubulin beta-4B chain	gi|5174735	50	48	120	yes	1.42	NP_006079	P68371	TBB4B	FALSE
113	elongation factor Tu, mitochondrial precursor	gi|34147630	50	20	50	yes	1.42	NP_003312	P49411	EFTU	FALSE
114	ATP synthase subunit gamma, mitochondrial isoform H (heart) precursor	gi|4885079	33	16	40	yes	1.42	NP_005165	P36542	ATPG	FALSE
115	dermcidin preproprotein	gi|16751921	11	6	15	yes	1.42	NP_444513	P81605	DCD	FALSE
116	14-3-3 protein gamma	gi|21464101	28	2	5	no	1.42	NP_036611	P61981	1433G	FALSE
117	hemoglobin subunit beta	gi|4504349	16	25	62	yes	1.41	NP_000509	P68871	HBB	FALSE
118	succinyl-CoA ligase [ADP/GDP-forming] subunit alpha, mitochondrial precursor	gi|109452591	36	14	34	yes	1.38	NP_003840	P53597	SUCA	FALSE
119	glycogen phosphorylase, brain form	gi|21361370	97	10	24	yes	1.37	NP_002853	P11216	PYGB	FALSE
120	myosin regulatory light chain 2, ventricular/cardiac muscle isoform	gi|94981553	19	5	12	yes	1.37	NP_000423	P10916	MLRV	FALSE
121	heat shock 70 protein 1A/1B	gi|194248072	70	17	40	yes	1.34	NP_005336	P08107	HSP71	FALSE
122	2,4-dienoyl-CoA reductase, mitochondrial precursor	gi|4503301	36	6	14	yes	1.33	NP_001350	Q16698	DECR	FALSE
123	ATP synthase subunit O, mitochondrial precursor	gi|4502303	23	14	31	yes	1.26	NP_001688	P48047	ATPO	FALSE
124	elongation factor 1-alpha 2	gi|4503475	50	26	57	yes	1.25	NP_001949	Q05639	EF1A2	FALSE
125	6-phosphofructokinase type C isoform 1	gi|11321601	86	5	11	yes	1.25	NP_002618	Q01813	K6PP	FALSE
126	isocitrate dehydrogenase [NADP], mitochondrial precursor	gi|28178832	51	86	186	yes	1.23	NP_002159	P48735	IDHP	FALSE
127	myosin light chain 3	gi|4557777	22	10	21	yes	1.2	NP_000249	P08590	MYL3	FALSE
128	succinyl-CoA ligase [ADP-forming] subunit beta, mitochondrial precursor	gi|11321583	50	27	54	yes	1.14	NP_003841	Q9P2R7	SUCB1	FALSE
129	pyruvate dehydrogenase protein X component, mitochondrial isoform 2	gi|203098816	51	6	12	yes	1.14	NP_001128496	O00330	ODPX	FALSE
130	creatine kinase M-type	gi|21536288	43	4	8	no	1.14	NP_001815	P06732	KCRM	FALSE
131	ATP synthase subunit delta, mitochondrial precursor	gi|4502297	17	3	6	no	1.14	NP_001678	P30049	ATPD	FALSE
132	calnexin precursor	gi|10716563	68	3	6	no	1.14	NP_001737	P27824	CALX	FALSE
133	integrin beta-1 isoform 1D precursor	gi|19743819	89	2	4	no	1.14	NP_391988	P05556	ITB1	FALSE
134	60 heat shock protein, mitochondrial	gi|31542947	61	43	84	yes	1.11	NP_002147	P10809	CH60	FALSE
135	LIM domain-binding protein 3 isoform 1	gi|45592959	77	37	72	yes	1.11	NP_009009	O75112	LDB3	TRUE
136	sarcalumenin precursor	gi|149363672	54	35	68	yes	1.11	NP_001092284	Q86TD4	SRCA	FALSE
137	sarcoplasmic/endoplasmic reticulum calcium ATPase 2 isoform b	gi|24638454	115	28	54	yes	1.1	NP_733765	P16615	AT2A2	FALSE
138	dihydrolipoyllysine-residue acetyltransferase component of pyruvate dehydrogenase complex, mitochondrial precursor	gi|31711992	69	13	25	yes	1.1	NP_001922	P10515	ODP2	FALSE
139	junction plakoglobin	gi|12056468	82	9	17	yes	1.08	NP_068831	P14923	PLAK	FALSE
140	ubiquinone biosynthesis protein COQ9, mitochondrial precursor	gi|40789233	36	9	17	yes	1.08	NP_064708	O75208	COQ9	FALSE
141	dihydrolipoyl dehydrogenase, mitochondrial precursor	gi|91199540	54	32	60	yes	1.07	NP_000099	P09622	DLDH	FALSE
142	ATP synthase subunit alpha, mitochondrial precursor	gi|4757810	60	199	370	yes	1.06	NP_004037	P25705	ATPA	FALSE
143	acetyl-CoA acetyltransferase, mitochondrial precursor	gi|4557237	45	41	76	yes	1.06	NP_000010	P24752	THIL	FALSE
144	electron transfer flavoprotein subunit beta isoform 1	gi|4503609	28	27	50	yes	1.06	NP_001976	P38117	ETFB	FALSE
145	enoyl-CoA hydratase, mitochondrial	gi|194097323	31	21	39	yes	1.06	NP_004083	P30084	ECHM	FALSE
146	phosphate carrier protein, mitochondrial isoform a precursor	gi|6031192	40	7	13	yes	1.06	NP_005879	Q00325	MPCP	FALSE
147	ATP synthase subunit beta, mitochondrial precursor	gi|32189394	57	143	264	yes	1.05	NP_001677	P06576	ATPB	FALSE
148	methylcrotonoyl-CoA carboxylase beta chain, mitochondrial	gi|11545863	61	73	133	yes	1.04	NP_071415	Q9HCC0	MCCB	FALSE
149	actin, cytoplasmic 2	gi|316659409	42	85	152	yes	1.02	NP_001186883	P63261	ACTG	FALSE
150	hornerin	gi|57864582	282	60	107	yes	1.02	NP_001009931	Q86YZ3	HORN	FALSE
151	trifunctional enzyme subunit alpha, mitochondrial precursor	gi|20127408	83	58	99	yes	0.97	NP_000173	P40939	ECHA	FALSE
152	heat shock protein HSP 90-beta	gi|20149594	83	34	58	yes	0.97	NP_031381	P08238	HS90B	FALSE
153	vimentin	gi|62414289	54	17	29	yes	0.97	NP_003371	P08670	VIME	FALSE
154	tubulin alpha-1B chain	gi|57013276	50	46	77	yes	0.95	NP_006073	P68363	TBA1B	FALSE
155	medium-chain specific acyl-CoA dehydrogenase, mitochondrial isoform b precursor	gi|187960098	47	75	117	yes	0.89	NP_001120800	P11310	ACADM	FALSE
156	creatine kinase S-type, mitochondrial precursor	gi|153251982	48	9	14	yes	0.89	NP_001816	P17540	KCRS	FALSE
157	protein-glutamine gamma-glutamyltransferase 2 isoform a	gi|39777597	77	9	14	yes	0.89	NP_004604	P21980	TGM2	FALSE
158	actin, alpha cardiac muscle 1 proprotein	gi|4885049	42	258	398	yes	0.88	NP_005150	P68032	ACTC	FALSE
159	apoptosis-inducing factor 1, mitochondrial isoform 2 precursor	gi|22202629	66	11	17	yes	0.88	NP_665811	O95831	AIFM1	FALSE
160	thioredoxin-dependent peroxide reductase, mitochondrial isoform b	gi|32483377	26	4	6	no	0.85	NP_054817	P30048	PRDX3	FALSE
161	protein-L-isoaspartate(D-aspartate) O-methyltransferase isoform 2	gi|354983493	30	49	72	yes	0.84	NP_001238978	P22061	PIMT	FALSE
162	L-lactate dehydrogenase B chain	gi|4557032	37	19	28	yes	0.84	NP_002291	P07195	LDHB	FALSE
163	alpha-crystallin B chain	gi|4503057	20	53	75	yes	0.81	NP_001876	P02511	CRYAB	FALSE
164	apolipoprotein A-I preproprotein	gi|4557321	31	19	27	yes	0.81	NP_000030	P02647	APOA1	FALSE
165	acid ceramidase isoform b	gi|189011546	47	5	7	no	0.8	NP_004306	Q13510	ASAH1	FALSE
166	6-phosphofructokinase, muscle type isoform 1	gi|266453619	93	30	41	yes	0.78	NP_001160158	P08237	K6PF	FALSE
167	isocitrate dehydrogenase [NAD] subunit beta, mitochondrial isoform a precursor	gi|28178821	42	11	15	yes	0.78	NP_008830	O43837	IDH3B	FALSE
168	pyruvate dehydrogenase E1 component subunit beta, mitochondrial isoform 1 precursor	gi|156564403	39	33	44	yes	0.76	NP_000916	P11177	ODPB	FALSE
169	decorin isoform a preproprotein	gi|4503271	40	12	16	yes	0.76	NP_001911	P07585	PGS2	FALSE
170	short/branched chain specific acyl-CoA dehydrogenase, mitochondrial precursor	gi|4501859	47	16	21	yes	0.75	NP_001600	P45954	ACDSB	FALSE
171	heat shock protein beta-6	gi|21389433	17	10	13	yes	0.74	NP_653218	O14558	HSPB6	FALSE
172	UPF0317 protein C14orf159, mitochondrial isoform a	gi|156139129	66	9	11	yes	0.7	NP_079228	Q7Z3D6	CN159	FALSE
173	ATP synthase subunit b, mitochondrial precursor	gi|21361565	29	24	29	yes	0.69	NP_001679	P24539	AT5F1	FALSE
174	citrate synthase, mitochondrial precursor	gi|38327625	52	5	6	no	0.68	NP_004068	O75390	CISY	FALSE
175	filamin-A isoform 1	gi|116063573	280	11	13	yes	0.67	NP_001447	P21333	FLNA	FALSE
176	electron transfer flavoprotein subunit alpha, mitochondrial isoform a	gi|4503607	35	49	57	yes	0.66	NP_000117	P13804	ETFA	FALSE
177	thiosulfate sulfurtransferase	gi|17402865	33	6	7	no	0.66	NP_003303	Q16762	THTR	FALSE
178	serum albumin preproprotein	gi|4502027	69	746	857	yes	0.65	NP_000468	P02768	ALBU	FALSE
179	tubulin beta chain	gi|29788785	50	41	47	yes	0.65	NP_821133	P07437	TBB5	FALSE
180	peroxiredoxin-2 isoform a	gi|32189392	22	8	9	no	0.64	NP_005800	P32119	PRDX2	FALSE
181	succinyl-CoA ligase [GDP-forming] subunit beta, mitochondrial isoform 2 precursor	gi|157779135	47	53	59	yes	0.63	NP_003839	Q96I99	SUCB2	FALSE
182	calsequestrin-2 precursor	gi|119395727	46	23	25	yes	0.62	NP_001223	O14958	CASQ2	FALSE
183	cytochrome c oxidase subunit II	gi|251831110	26	11	12	yes	0.62	YP_003024029	P00403	COX2	FALSE
184	filamin-C isoform a	gi|116805322	291	154	164	yes	0.61	NP_001449	Q14315	FLNC	FALSE
185	3-ketoacyl-CoA thiolase, mitochondrial	gi|167614485	42	17	18	yes	0.6	NP_006102	P42765	THIM	FALSE
186	tubulin alpha-4A chain	gi|17921989	50	39	40	yes	0.58	NP_005991	P68366	TBA4A	FALSE
187	isocitrate dehydrogenase [NAD] subunit alpha, mitochondrial precursor	gi|5031777	40	21	21	yes	0.57	NP_005521	P50213	IDH3A	FALSE
188	aconitate hydratase, mitochondrial precursor	gi|4501867	85	13	13	yes	0.57	NP_001089	Q99798	ACON	FALSE
189	desmoglein-1 preproprotein	gi|119703744	114	13	13	yes	0.57	NP_001933	Q02413	DSG1	FALSE
190	[Protein ADP-ribosylarginine] hydrolase-like protein 1 isoform 1	gi|21702735	40	12	12	yes	0.57	NP_612439	Q8NDY3	ARHL1	FALSE
191	ras-related protein Rab-1B	gi|13569962	22	12	12	yes	0.57	NP_112243	Q9H0U4	RAB1B	FALSE
192	cysteine and glycine-rich protein 3	gi|4502893	21	10	10	no	0.57	NP_003467	P50461	CSRP3	FALSE
193	tropomyosin alpha-1 chain isoform 1	gi|63252898	33	8	8	no	0.57	NP_001018005	P09493	TPM1	FALSE
194	2-methoxy-6-polyprenyl-1,4-benzoquinol methylase, mitochondrial precursor	gi|116063536	37	4	4	no	0.57	NP_115690	Q5HYK3	COQ5	FALSE
195	dynamin-like 120 protein, mitochondrial isoform 2	gi|18860831	108	4	4	no	0.57	NP_570844	E5KLK2	E5KLK2	FALSE
196	pyruvate dehydrogenase E1 component subunit alpha, somatic form, mitochondrial isoform 2 precursor	gi|291084742	48	29	26	yes	0.51	NP_001166925	P08559	ODPA	FALSE
197	dihydrolipoyllysine-residue succinyltransferase component of 2-oxoglutarate dehydrogenase complex, mitochondrial isoform 1 precursor	gi|19923748	49	22	19	yes	0.49	NP_001924	P36957	ODO2	FALSE
198	ATP synthase subunit d, mitochondrial isoform a	gi|5453559	18	19	16	yes	0.48	NP_006347	O75947	ATP5H	FALSE
199	tripeptidyl-peptidase 1 preproprotein	gi|5729770	61	5	4	no	0.46	NP_000382	O14773	TPP1	FALSE
200	desmoplakin isoform I	gi|58530840	332	33	26	yes	0.45	NP_004406	P15924	DESP	FALSE
201	propionyl-CoA carboxylase beta chain, mitochondrial isoform 1	gi|119943100	58	129	69	yes	0.3	NP_000523	P05166	PCCB	FALSE
202	filaggrin-2	gi|62122917	248	10	5	no	0.28	NP_001014364	Q5D862	FILA2	FALSE
203	actin, alpha skeletal muscle	gi|4501881	42	117	44	yes	0.21	NP_001091	P68133	ACTS	FALSE
204	propionyl-CoA carboxylase alpha chain, mitochondrial isoform b	gi|189095269	77	108	37	yes	0.2	NP_001121164	P05165	PCCA	FALSE
205	tubulin alpha-8 chain isoform 1	gi|9507215	50	30	0	yes	0	NP_061816	Q9NY65	TBA8	FALSE
206	aspartyl-tRNA synthetase, cytoplasmic	gi|45439306	57	2	0	no	0	NP_001340	P14868	SYDC	FALSE
207	cofilin-1	gi|5031635	19	4	0	no	0	NP_005498	P23528	COF1	FALSE
208	death-inducer obliterator 1 isoform c	gi|301129165	244	2	0	no	0	NP_149072	Q9BTC0	DIDO1	FALSE
209	lanC-like protein 1	gi|212274337	45	3	0	no	0	NP_001130046	O43813	LANC1	FALSE
210	prelamin-A/C isoform 1 precursor	gi|27436946	74	4	0	no	0	NP_733821	P02545	LMNA	FALSE
211	serpin B12	gi|17998551	46	2	0	no	0	NP_536722	Q96P63	SPB12	FALSE

## Sheet: SC > 10 & Ratio > 10 to INF
				Pooled		Spectral counts	Normalized
	Protein	accession	Mass	Spectral Counts		> 10	SC ratio
S.No			Da	-	+	Significant	+/-	acc	uniprot	short_name	PDZ domain
1	disks large homolog 1 isoform 2	gi|148539578	103	0	37	yes	inf	NP_004078	Q12959	DLG1	TRUE
2	membrane-associated guanylate kinase, WW and PDZ domain-containing protein 1 isoform c	gi|74272284	162	0	13	yes	inf	NP_001028229	Q96QZ7	MAGI1	TRUE
3	alpha-1-syntrophin	gi|4507137	54	0	18	yes	inf	NP_003089	Q13424	SNTA1	TRUE
1	acetyl-CoA carboxylase 2 precursor	gi|134142062	277	0	56	yes	inf	NP_001084	O00763	ACACB	FALSE
2	acyl-coenzyme A thioesterase 9, mitochondrial isoform b precursor	gi|81295404	50	0	11	yes	inf	NP_001028755	Q9Y305	ACOT9	FALSE
3	ADP-ribosylation factor 1	gi|4502201	21	0	11	yes	inf	NP_001649	P84077	ARF1	FALSE
4	cathepsin D preproprotein	gi|4503143	45	0	12	yes	inf	NP_001900	P07339	CATD	FALSE
5	elongation factor 1-alpha 1	gi|4503471	50	0	18	yes	inf	NP_001393	P68104	EF1A1	FALSE
6	78 glucose-regulated protein precursor	gi|16507237	72	0	78	yes	inf	NP_005338	P11021	GRP78	FALSE
7	hemoglobin subunit alpha	gi|4504345	15	0	15	yes	inf	NP_000508	P69905	HBA	FALSE
8	hemicentin-1 precursor	gi|118572606	613	0	13	yes	inf	NP_114141	Q96RW7	HMCN1	FALSE
9	heat shock protein HSP 90-alpha isoform 1	gi|153792590	98	0	17	yes	inf	NP_001017963	P07900	HS90A	FALSE
10	eukaryotic initiation factor 4A-II	gi|83700235	46	0	14	yes	inf	NP_001958	Q14240	IF4A2	FALSE
11	NAD(P) transhydrogenase, mitochondrial	gi|122939155	114	0	23	yes	inf	NP_036475	Q13423	NNTM	FALSE
12	peroxiredoxin-1	gi|320461711	22	0	14	yes	inf	NP_001189360	Q06830	PRDX1	FALSE
13	troponin I, cardiac muscle	gi|151101270	24	0	13	yes	inf	NP_000354	P19429	TNNI3	FALSE
